# Supplementary material
Source: PubMed Central journal article supplement (PMC1221651)
Supplement: bj3540259add.pdf [file bj3540259add.pdf]

**recombinant human H-FABP (pH 5.5 / 310K)**

| AA   | HN    | N     | H $\alpha$ | H $\beta$ | H $\gamma$ | H $\delta$ | H $\epsilon$ | other H                       | other N |
|------|-------|-------|------------|-----------|------------|------------|--------------|-------------------------------|---------|
| V 1  | n.a.  | n.a.  | 4,25       | 2,30      | 1,07/1,00  |            |              |                               |         |
| D 2  | 8,39  | 118,4 | 4,23       | 2,68/2,56 |            |            |              |                               |         |
| A 3  | 7,87  | 120,3 | 4,17       | 1,25      |            |            |              |                               |         |
| F 4  | 7,94  | 112,7 | 4,30       | 3,14/3,00 |            |            |              | 7,09/6,92/7,51                |         |
| L 5  | 7,28  | 114,6 | 4,18       | 2,00      | 1,56       | 1,05/0,69  |              |                               |         |
| G 6  | 8,74  | 108,8 | 4,30/3,80  |           |            |            |              |                               |         |
| T 7  | 8,18  | 116,6 | 4,85       | 3,89      | 1,13       |            |              |                               |         |
| W 8  | 9,65  | 127,8 | 5,32       | 3,34/2,98 |            |            |              | 7,02/9,57/7,14/7,35/7,19/6,99 | 127,5   |
| K 9  | 10,01 | 123,6 | 5,42       | 1,98/1,93 | 1,56/1,49  | 1,73       | 2,96         |                               |         |
| L 10 | 7,78  | 126,7 | 3,44       | 1,46/1,16 | 1,28       | 0,81/0,41  |              |                               |         |
| V 11 | 9,24  | 119,9 | 4,58       | 2,22      | 0,97/0,83  |            |              |                               |         |
| D 12 | 7,69  | 119,1 | 4,88       | 2,74/2,45 |            |            |              |                               |         |
| S 13 | 8,22  | 115,3 | 4,95       | 3,72/3,45 |            |            |              |                               |         |
| K 14 | 8,96  | 128,4 | 4,87       | 1,93      | 1,52/1,44  | 1,79/1,72  | 3,08         |                               |         |
| N 15 | 9,42  | 119,8 | 4,82       | 3,55/3,32 |            |            |              | 7,65/7,13                     | 111,5   |
| F 16 | 8,59  | 120,4 | 5,14       | 3,16/3,07 |            |            |              | 7,49/7,05/7,08                |         |
| D 17 | 8,88  | 119,2 | 4,14       | 2,70/2,60 |            |            |              |                               |         |
| D 18 | 7,87  | 116,7 | 4,30       | 2,80/2,66 |            |            |              |                               |         |
| Y 19 | 7,62  | 119,8 | 4,03       | 3,24/2,99 |            |            |              | 6,94/6,78/6,42/6,47/6,35      |         |
| M 20 | 8,35  | 117,0 | 3,43       | 2,10/1,94 | 1,59/1,37  |            | 2,16         |                               |         |
| K 21 | 8,98  | 120,1 | 3,87       | 1,89/1,73 | 1,49/1,30  | 1,66       | 2,96         |                               |         |
| S 22 | 7,84  | 116,6 | 4,22       | 4,25/4,10 |            |            |              |                               |         |
| L 23 | 7,10  | 117,3 | 4,03       | 1,58/1,27 | 1,01       | 0,33/0,14  |              |                               |         |
| G 24 | 7,85  | 106,8 | 4,21/3,72  |           |            |            |              |                               |         |
| V 25 | 7,46  | 121,8 | 3,76       | 1,42      | 1,00/0,83  |            |              |                               |         |
| G 26 | 8,94  | 116,5 | 4,10/4,03  |           |            |            |              |                               |         |
| F 27 | 8,70  | 122,0 | 3,85       | 3,29/3,03 |            |            |              | 7,21/7,35/7,30                |         |
| A 28 | 8,76  | 120,5 | 3,92       | 1,45      |            |            |              |                               |         |
| T 29 | 7,48  | 114,9 | 3,81       | 4,00      | 1,07       |            |              |                               |         |
| R 30 | 8,32  | 120,8 | 3,66       | 1,86      | 1,78/1,25  | 3,24/2,81  | 7,68         |                               | 82,0    |
| Q 31 | 7,92  | 116,9 | 3,79       | 1,84/1,79 | 1,98/1,93  |            |              | 6,91/6,76                     | 112,6   |
| V 32 | 6,94  | 117,1 | 3,69       | 1,64      | 0,87/0,53  |            |              |                               |         |
| A 33 | 8,58  | 123,1 | 3,86       | 1,30      |            |            |              |                               |         |

| AA   | HN   | N     | H $\alpha$ | H $\beta$ | H $\gamma$ | H $\delta$ | H $\epsilon$ | other H        | other N |
|------|------|-------|------------|-----------|------------|------------|--------------|----------------|---------|
| S 34 | 8,27 | 112,9 | 4,36       | 4,08/3,99 |            |            |              |                |         |
| M 35 | 7,22 | 117,5 | 4,67       | 2,27/2,11 | 2,75/2,64  |            | 2,11         |                |         |
| T 36 | 7,20 | 113,5 | 4,38       | 4,24      | 1,42       |            |              |                |         |
| K 37 | n.a. | n.a.  | 4,91       | n.a.      | n.a.       | n.a.       | n.a.         |                |         |
| P38  | -    | n.a.  | 5,00       | 2,28/2,21 | 2,01/1,62  | 3,86/3,65  |              |                |         |
| T 39 | 8,84 | 115,9 | 5,49       | 4,08      | 1,31       |            |              |                |         |
| T 40 | 9,91 | 123,5 | 5,57       | 3,49      | 0,94       |            |              |                |         |
| I 41 | 9,57 | 129,6 | 5,19       | 1,52      | 0,87       | 0,72       |              | 1,50/1,27      |         |
| I 42 | 9,21 | 127,0 | 5,12       | 2,39      | 0,74       | 0,69       |              | 1,74           |         |
| E 43 | 9,11 | 127,2 | 4,81       | 2,00/1,82 | 2,15/2,03  |            |              |                |         |
| K 44 | 8,58 | 120,4 | 4,98       | 1,70/1,48 | 1,35/1,11  | 1,56       | 3,03/2,97    |                |         |
| N 45 | 8,62 | 124,7 | 4,83       | 2,66/2,59 |            |            |              | 7,63/6,86      | 112,9   |
| G 46 | 9,04 | 116,4 | 3,97/3,62  |           |            |            |              |                |         |
| D 47 | 8,71 | 125,9 | 4,60       | 2,78/2,66 |            |            |              |                |         |
| I 48 | 7,68 | 119,1 | 4,15       | 1,92      | 0,59       | 0,73       |              | 1,49/1,02      |         |
| L 49 | 8,85 | 132,4 | 4,82       | 0,73/0,63 | 1,40       | 0,76/0,70  |              |                |         |
| T 50 | 8,55 | 116,0 | 5,05       | 3,65      | 1,03       |            |              |                |         |
| L 51 | 9,04 | 128,6 | 5,24       | 1,74/1,39 | 1,56       | 0,75/0,71  |              |                |         |
| K 52 | 9,68 | 128,5 | 5,12       | 1,70      | 1,29       | 1,64/1,56  | 2,80/2,69    |                |         |
| T 53 | 9,12 | 120,0 | 5,10       | 4,24      | 1,12       |            |              |                |         |
| H 54 | 9,73 | 126,2 | 5,98       | 3,22/3,19 |            |            |              | 7,07/8,43      |         |
| S 55 | 8,63 | 116,1 | 5,05       | 4,26/3,98 |            |            |              |                |         |
| T 56 | 8,23 | 108,9 | 4,16       | 4,46      | 1,35       |            |              |                |         |
| F 57 | 7,68 | 120,3 | 4,84       | 3,22/2,77 |            |            |              | 7,17/7,28/7,17 |         |
| K 58 | 6,75 | 115,8 | 4,33       | 1,48/1,34 | 0,90/0,88  | 1,55/1,46  | 2,77/2,69    |                |         |
| N 59 | 8,52 | 121,6 | 5,91       | 2,77      |            |            |              | 7,32/6,50      | 111,7   |
| T 60 | 9,33 | 112,3 | 4,89       | 4,41      | 1,12       |            |              |                |         |
| E 61 | 8,58 | 121,5 | 5,15       | 1,96      | 2,08       |            |              |                |         |
| I 62 | 8,36 | 118,4 | 4,91       | 1,92      | 1,25       | 0,97       |              | 1,77/1,57      |         |
| S 63 | 8,18 | 116,9 | 5,58       | 3,52/3,44 |            |            |              |                |         |
| F 64 | 8,42 | 119,5 | 4,56       | 2,67/1,73 |            |            |              | 6,29/6,79/6,64 |         |
| K 65 | 8,72 | 118,3 | 4,87       | 1,84      | 1,49/1,44  | 1,68/1,63  | 2,93         |                |         |
| L 66 | 9,09 | 124,9 | 4,51       | 1,86      | 1,56       | 0,97/0,78  |              |                |         |
| G 67 | 9,46 | 108,5 | 4,25/3,47  |           |            |            |              |                |         |
| V 68 | 7,61 | 120,5 | 4,45       | 2,24      | 1,14/0,93  |            |              |                |         |

| AA    | HN   | N     | H $\alpha$ | H $\beta$ | H $\gamma$ | H $\delta$ | H $\epsilon$ | other H                        | other N |
|-------|------|-------|------------|-----------|------------|------------|--------------|--------------------------------|---------|
| E 69  | 9,08 | 133,0 | 5,09       | 2,05      | 2,24       |            |              |                                |         |
| F 70  | 9,45 | 121,7 | 5,21       | 3,29d     |            |            |              | 7,49/6,97/6,28                 |         |
| D 71  | 8,49 | 120,0 | 5,16       | 2,76/2,67 |            |            |              |                                |         |
| E 72  | 8,54 | 126,1 | 4,77       | 1,84/1,81 | 2,32/1,64  |            |              |                                |         |
| T 73  | 8,74 | 124,6 | 5,38       | 4,07      | 1,21       |            |              |                                |         |
| T 74  | 9,11 | 119,0 | 4,51       | 4,36      | 0,84       |            |              | 5,91                           |         |
| A 75  | 9,49 | 122,7 | 3,98       | 1,43      |            |            |              |                                |         |
| D 76  | 9,20 | 110,5 | 4,51       | 2,80/2,16 |            |            |              |                                |         |
| D 77  | 8,02 | 115,3 | 4,06       | 2,91/2,68 |            |            |              |                                |         |
| R 78  | 7,37 | 116,4 | 4,11       | 1,43/0,43 | 1,09/0,87  | 2,64/0,59  | 9,48         |                                | 91,4    |
| K 79  | 8,20 | 123,3 | 4,92       | 1,80      | 1,46       | 1,70       | 3,01         |                                |         |
| V 80  | 8,92 | 116,0 | 5,14       | 2,08      | 0,62/0,25  |            |              |                                |         |
| K 81  | 8,83 | 121,6 | 4,95       | 1,88      | 1,56/1,48  | 1,74       | 2,97         |                                |         |
| S 82  | 9,18 | 124,8 | 5,84       | 3,03/2,02 |            |            |              |                                |         |
| I 83  | 8,40 | 117,6 | 4,27       | 1,78      | 0,97       | 0,84       |              | 1,45                           |         |
| V 84  | 9,68 | 130,8 | 5,43       | 1,33      | 0,48/-0,34 |            |              |                                |         |
| T 85  | 8,96 | 117,2 | 4,68       | 4,21      | 1,17       |            |              |                                |         |
| L 86  | 8,56 | 122,5 | 5,28       | 1,86/1,26 | 1,51       | 0,87/0,78  |              |                                |         |
| D 87  | 8,97 | 126,8 | 4,96       | 2,70/2,48 |            |            |              |                                |         |
| G 88  | 8,93 | 116,1 | 3,95/3,83  |           |            |            |              |                                |         |
| G 89  | 8,59 | 109,8 | 4,05d      |           |            |            |              |                                |         |
| K 90  | 7,80 | 118,9 | 4,98       | 1,94      | 1,50/1,26  | 1,56       | 2,96         |                                |         |
| L 91  | 8,81 | 124,7 | 4,83       | 1,28/0,69 | 0,95       | 0,37/0,33  |              |                                |         |
| V 92  | 9,63 | 131,8 | 4,11       | 2,27      | 0,97/0,84  |            |              |                                |         |
| H 93  | 8,63 | 130,7 | 5,39       | 3,96/2,68 |            |            |              | 6,50/7,88                      |         |
| L 94  | 9,21 | 129,8 | 5,03       | 1,96/1,37 | 1,45       | 0,90/0,86  |              |                                |         |
| Q 95  | 8,72 | 123,8 | 5,14       | 2,21/1,30 | 2,43/1,62  |            |              | 7,05/6,95                      | 112,6   |
| K 96  | 9,11 | 119,5 | 5,52       | 1,98/1,84 | 1,51       | 1,70       | 2,90         |                                |         |
| W 97  | 8,26 | 126,7 | 4,92       | 3,70/3,26 |            |            |              | 7,22/10,16/7,16/7,10/6,78/6,26 | 129,8   |
| D 98  | 9,15 | 121,8 | 4,28       | 2,80/2,38 |            |            |              |                                |         |
| G 99  | 8,30 | 105,0 | 3,98/3,63  |           |            |            |              |                                |         |
| Q 100 | 8,44 | 120,2 | 4,43       | 1,28/0,53 | 1,80/1,51  |            |              | 7,18/6,92                      | 113,2   |
| E 101 | 8,14 | 116,4 | 5,79       | 2,07/1,94 | 2,19/2,11  |            |              |                                |         |
| T 102 | 9,02 | 114,7 | 5,45       | 4,41      | 1,33       |            |              |                                |         |
| T 103 | 8,01 | 116,2 | 5,49       | 4,01      | 1,19       |            |              |                                |         |

| AA    | HN    | N     | H $\alpha$ | H $\beta$  | H $\gamma$ | H $\delta$ | H $\epsilon$ | other H   | other N |
|-------|-------|-------|------------|------------|------------|------------|--------------|-----------|---------|
| L 104 | 9,52  | 125,2 | 5,00       | 1,89/1,37  | 1,48       | 0,74/0,38  |              |           |         |
| V 105 | 9,23  | 127,2 | 4,88       | 2,03       | 1,07/0,93  |            |              |           |         |
| R 106 | 8,93  | 126,4 | 5,64       | 1,41       | 1,88/1,19  | 2,72/2,58  | 7,53         |           | 82,5    |
| E 107 | 8,80  | 121,6 | 4,93       | 1,98/1,91  | 2,19/2,11  |            |              |           |         |
| L 108 | 8,69  | 125,2 | 5,27       | 1,44/1,24  | 0,98       | 0,42/0,25  |              |           |         |
| I 109 | 8,85  | 124,5 | 4,26       | 1,72       | 0,85       | 0,77       |              | 1,35/1,04 |         |
| D 110 | 9,30  | 128,8 | 4,34       | 3,04/2,64  |            |            |              |           |         |
| G 111 | 8,49  | 103,1 | 4,27/3,68  |            |            |            |              |           |         |
| K 112 | 8,05  | 121,4 | 4,94       | 1,96/1,93  | 1,58       | 1,71       | 3,08         |           |         |
| L 113 | 8,41  | 124,1 | 4,61       | 1,04/-0,22 | 0,89       | 0,08/-0,13 |              |           |         |
| I 114 | 9,34  | 128,7 | 4,80       | 2,06       | 0,81       | 0,83       |              | 1,56/1,40 |         |
| L 115 | 9,52  | 132,6 | 5,48       | 2,08/1,24  | 1,30       | 0,81/0,64  |              |           |         |
| T 116 | 9,73  | 124,5 | 5,29       | 3,88       | 1,05       |            |              |           |         |
| L 117 | 9,64  | 131,8 | 5,26       | 0,76/0,35  | 1,21       | 0,69/0,62  |              |           |         |
| T 118 | 8,64  | 116,7 | 5,57       | 4,11       | 1,25       |            |              |           |         |
| H 119 | 9,58  | 131,6 | 5,21       | 3,33/3,11  |            |            |              | 7,87/8,32 |         |
| G 120 | 9,28  | 118,0 | 3,81/3,59  |            |            |            |              |           |         |
| T 121 | 8,68  | 117,4 | 4,29       | 4,58       | 1,24       |            |              |           |         |
| A 122 | 8,45  | 127,8 | 4,63       | 1,58       |            |            |              |           |         |
| V 123 | 8,19  | 123,2 | 5,18       | 1,94       | 0,94/0,81  |            |              |           |         |
| C 124 | 9,48  | 129,1 | 5,30       | 3,32/2,23  | 2,66       |            |              |           |         |
| T 125 | 8,07  | 122,2 | 5,33       | 3,84       | 1,15       |            |              |           |         |
| R 126 | 10,05 | 129,9 | 4,89       | 1,85/1,80  | 1,66/1,47  | 2,62/2,58  | 7,39         |           | n.a.    |
| T 127 | 8,67  | 120,1 | 4,93       | 3,83       | 1,14       |            |              |           |         |
| Y 128 | 9,98  | 128,5 | 5,42       | 3,36/3,10  |            |            |              | 6,89/6,56 |         |
| E 129 | 9,37  | 120,1 | 5,37       | 2,10/2,05  | 2,40/2,37  |            |              |           |         |
| K 130 | 9,31  | 127,8 | 3,78       | 1,46       | 0,87/0,20  | 1,17/1,09  | 2,63/2,57    |           |         |
| E 131 | 8,77  | 127,5 | 4,35       | 1,91/1,75  | 2,23/2,19  |            |              |           |         |
| A 132 | 7,92  | 130,9 | 4,07       | 1,32       |            |            |              |           |         |
